# Supplementary material for: Super Divya, an Interactive Digital Storytelling Instructional Comic Series to Sustain Facilitation Skills of Labor and Delivery Nurse Mentors in Bihar, India—A Pilot Study
Source: Int J Environ Res Public Health. 2022 Feb 25;19(5):2675. doi: 10.3390/ijerph19052675 (PMC8910046; doi:10.3390/ijerph19052675)
Supplement: Supplementary file 1 [file ijerph-19-02675-s001.zip › ijerph-1569256-supplementary.pdf]

## **S1-Super Divya Manuscript Supplementary Information**

### **Super Divya, an Interactive Digital Storytelling Instructional Comic Series to Sustain Facilitation Skills of Labor and Delivery Nurse Mentors in Bihar, India—A Pilot Study**

**Anika Kalra <sup>1</sup>, Nidhi Subramaniam <sup>2</sup>, Ojungsangla Longkumer <sup>3</sup>, Manju Siju <sup>3</sup>, Liya Susan Jose <sup>3</sup>, Rohit Srivastava <sup>3</sup>, Sunny Lin <sup>1</sup>, Seema Handu <sup>3</sup>, Sudha Murugesan <sup>4</sup>, Mikelle Lloyd <sup>5</sup>, Solange Madriz <sup>1</sup>, Alisa Jenny <sup>1</sup>, Kevin Thorn <sup>6</sup>, Kimberly Calkins <sup>7</sup>, Heidi Breeze-Harris <sup>7</sup>, Susanna R. Cohen <sup>5</sup>, Rakesh Ghosh <sup>1,\*</sup> and Dilys Walker <sup>1</sup>**

#### **SUPPLEMENTARY INFORMATION**

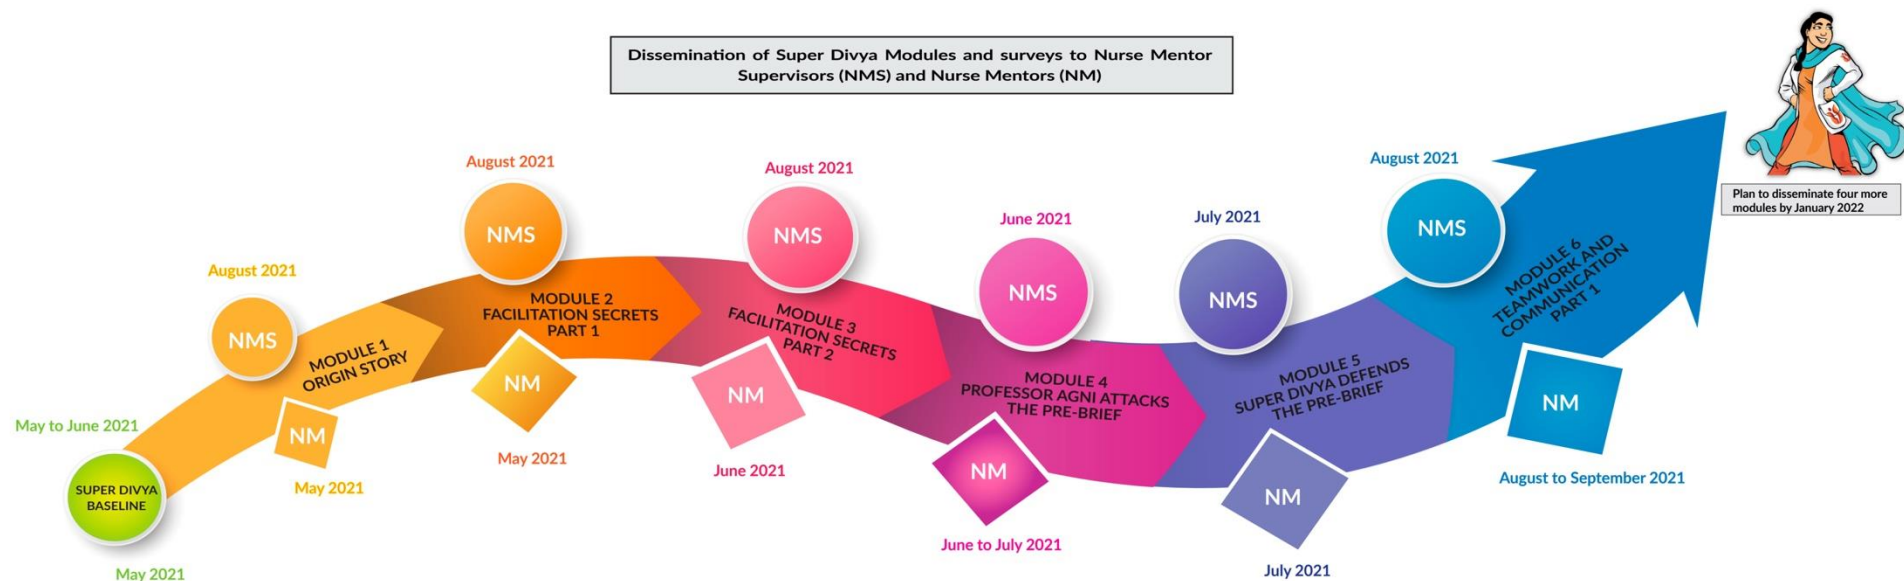

**Supplementary Figure S1. Super Divya module distribution timeline.**

**Supplementary Table S1: Super Divya (SD) Module (M) Knowledge Survey Tools.**

| Baseline Survey Tool                        |                                                                                                                                   |            |                |
|---------------------------------------------|-----------------------------------------------------------------------------------------------------------------------------------|------------|----------------|
| Topics                                      | Knowledge Questions                                                                                                               | Choices    | Correct Answer |
| SD M1: Origin                               | 1. A facilitator knows all the answer to participants' questions.                                                                 | True/False | False          |
|                                             | 2. A facilitator should stop the simulation when a nurse misses a clinical management step.                                       | True/False | False          |
| SD M2: Facilitation secrets part 1          | 3. Greeting nurses when they arrive at the training is an important step in creating safe learning space.                         | True/False | True           |
|                                             | 4. In a safe learning space nurses feel supported and open to learning.                                                           | True/False | True           |
| SD M3: Facilitation secrets part 2          | 5. To bring my genuine self, I need to avoid challenging situations.                                                              | True/False | False          |
|                                             | 6. The energy scanner is a tool that Super Divya uses to measure the energy of others in the room.                                | True/False | False          |
| SD M4: Professor Agni attacks the Pre-brief | 7. During the pre-brief, the facilitator should remind participants how to manage medical complications.                          | True/False | False          |
|                                             | 8. During the pre-brief, the facilitator should allow providers time to review the simulation area.                               | True/False | True           |
| SD M5: Super Divya defends the Pre-brief    | 9. A genuine self-practice can help a facilitator calm her mind to feel centered.                                                 | True/False | True           |
|                                             | 10. For a successful simulation training, the facilitators need to ignore their own emotions.                                     | True/False | False          |
| SD M6: Teamwork and communication part 1    | 11. Clinical knowledge is a behavioral objective.                                                                                 | True/False | False          |
|                                             | 12. If there are communication issues in the simulation, the facilitator should bring them up in the debrief.                     | True/False | True           |
| SD M7: Teamwork and communication part 2    | 13. An SBAR is given when a new nurse or doctor enters the clinical scenario to provide details of the patient's medical history. | True/False | False          |
|                                             | 14. Paying attention during the simulation for examples of the communication techniques can help me prepare for the debrief.      | True/False | True           |
|                                             | 15. Empathy means to understand one's and other's feelings.                                                                       | True/False | True           |

|                                                          |                                                                                                                                               |                |                       |
|----------------------------------------------------------|-----------------------------------------------------------------------------------------------------------------------------------------------|----------------|-----------------------|
| <b>SD M8: Introducing the Debrief</b>                    | 16. One of the goals of the debrief huddle is to decide which nurses should speak up first.                                                   | True/False     | False                 |
| <b>SD M9: Super Divya decodes the Debrief</b>            | 17. The debrief has 3 phases: description, recommendation, and application.                                                                   | True/False     | False                 |
|                                                          | 18. Open-ended questions are helpful in the debrief to understand the nurses' thoughts and feelings.                                          | True/False     | True                  |
| <b>SD M10: The Epic Battle over the Debrief</b>          | 19. When participants show disinterest during the debrief, the facilitator should ignore them.                                                | True/False     | False                 |
|                                                          | 20. If everything went well during the simulation, there's no need to have a debrief.                                                         | True/False     | False                 |
| <b>Module 1 Survey Tool: Origin Story</b>                |                                                                                                                                               |                |                       |
| <b>S. No.</b>                                            | <b>Knowledge Questions</b>                                                                                                                    | <b>Choices</b> | <b>Correct Answer</b> |
| 1                                                        | A facilitator makes everyone feel comfortable and welcome.                                                                                    | True/False     | True                  |
| 2                                                        | A facilitator knows all the answers to participants questions.                                                                                | True/False     | False                 |
| 3                                                        | A facilitator encourages participants to learn from errors made in simulation.                                                                | True/False     | True                  |
| 4                                                        | A facilitator should stop the simulation when a participant makes a clinical error.                                                           | True/False     | False                 |
| 5                                                        | A facilitator points out only errors and ignores the good things.                                                                             | True/False     | False                 |
| <b>Module 2 Survey Tool: Facilitation secrets part 1</b> |                                                                                                                                               |                |                       |
| <b>S. No.</b>                                            | <b>Knowledge Questions</b>                                                                                                                    | <b>Choices</b> | <b>Correct Answer</b> |
| 1                                                        | Greeting nurses when they arrive at the training is an important step in creating safe learning.                                              | True/False     | True                  |
| 2                                                        | Greeting nurses when they arrive at the training is an important step in creating safe learning.                                              | True/False     | False                 |
| 3                                                        | In a safe learning space nurses feel supported and open to learning.                                                                          | True/False     | True                  |
| 4                                                        | Super Divya suggests to have a notebook to write down observations and questions during the simulation.                                       | True/False     | True                  |
| 5                                                        | To create a safe learning space, the facilitator should locate and dispose the containers of hazardous biomedical waste for all participants. | True/False     | False                 |

| Module 3 Survey Tool: Facilitation secrets part 2          |                                                                                                                 |                                                                                                                                                                   |                                                                                                                                                               |
|------------------------------------------------------------|-----------------------------------------------------------------------------------------------------------------|-------------------------------------------------------------------------------------------------------------------------------------------------------------------|---------------------------------------------------------------------------------------------------------------------------------------------------------------|
| S. No.                                                     | Knowledge Questions                                                                                             | Choices                                                                                                                                                           | Correct Answer                                                                                                                                                |
| 1                                                          | To bring my genuine self, I need to avoid challenging situations.                                               | True/False                                                                                                                                                        | False                                                                                                                                                         |
| 2                                                          | A facilitator can influence how participants feel during the simulation.                                        | True/False                                                                                                                                                        | True                                                                                                                                                          |
| 3                                                          | According to Super Divya, the most important thing a facilitator brings to a simulation is her authority.       | True/False                                                                                                                                                        | False                                                                                                                                                         |
| 4                                                          | The concept of the genuine self means to work independently and solve my own problems.                          | True/False                                                                                                                                                        | False                                                                                                                                                         |
| 5                                                          | The “Genuine Self” includes the facilitator’s listening skills, empathy, compassion and curiosity.              | True/False                                                                                                                                                        | True                                                                                                                                                          |
| 6                                                          | The energy scanner is a tool that Super Divya uses to measure the energy of others in the room.                 | True/False                                                                                                                                                        | False                                                                                                                                                         |
| 7                                                          | To bring my genuine self to a training, I need to know the correct answer for all the questions the nurses ask. | True/False                                                                                                                                                        | False                                                                                                                                                         |
| Module 4 Survey Tool: Professor Agni attacks the Pre-brief |                                                                                                                 |                                                                                                                                                                   |                                                                                                                                                               |
| S. No.                                                     | Knowledge Questions                                                                                             | Choices                                                                                                                                                           | Correct Answer                                                                                                                                                |
| 1                                                          | During the pre-brief, the facilitator should remind participants how to manage complications.                   | True/False                                                                                                                                                        | False                                                                                                                                                         |
| 2                                                          | During the pre-brief, the facilitator should allow providers time to review the simulation area.                | True/False                                                                                                                                                        | True                                                                                                                                                          |
| 3                                                          | The pre-brief is part of making a safe learning space.                                                          | True/False                                                                                                                                                        | True                                                                                                                                                          |
| 4                                                          | A participant can ask the facilitator for clinical help at any time during a simulation.                        | True/False                                                                                                                                                        | False                                                                                                                                                         |
| 5                                                          | Identify the 4 steps of the pre-brief.                                                                          | 1. Debrief huddle<br>2. Tour of the simulation and supplies<br>3. Rules of simulation<br>4. Obstetric and newborn care<br>5. Things to remember during simulation | 2. Tour of the simulation and supplies<br>3. Rules of simulation<br>5. Things to remember during simulation<br>6. Communication techniques and RMC components |

|                                                                |                                                                                                                                                                                                                                                                                                                                                                            | 6. Communication techniques and RMC components<br>7. History of simulation                                                                                                  |                                         |
|----------------------------------------------------------------|----------------------------------------------------------------------------------------------------------------------------------------------------------------------------------------------------------------------------------------------------------------------------------------------------------------------------------------------------------------------------|-----------------------------------------------------------------------------------------------------------------------------------------------------------------------------|-----------------------------------------|
| <b>Module 5 Survey Tool: Super Divya defends the Pre-brief</b> |                                                                                                                                                                                                                                                                                                                                                                            |                                                                                                                                                                             |                                         |
| <b>S. No.</b>                                                  | <b>Knowledge Questions</b>                                                                                                                                                                                                                                                                                                                                                 | <b>Choices</b>                                                                                                                                                              | <b>Correct Answer</b>                   |
| <b>1</b>                                                       | A genuine self-practice can help a facilitator calm her mind to feel centered.                                                                                                                                                                                                                                                                                             | True/False                                                                                                                                                                  | True                                    |
| <b>2</b>                                                       | For a successful simulation training, the facilitators need to ignore their own emotions.                                                                                                                                                                                                                                                                                  | True/False                                                                                                                                                                  | False                                   |
| <b>3</b>                                                       | The facilitator spray is an imaginary tool that can be used to:                                                                                                                                                                                                                                                                                                            | 1. Help recognize participants emotions<br>2. Refresh the air of the simulation area<br>3. Help recognize facilitators emotions<br>4. Repel the bugs of the simulation area | 5. Help recognize facilitators emotions |
| <b>Acceptability, Adoption and Feasibility:</b>                |                                                                                                                                                                                                                                                                                                                                                                            |                                                                                                                                                                             |                                         |
| <b>Acceptability Questions</b>                                 | 1. Did you like viewing Super Divya modules?<br>2. Do you feel good about using Super Divya?<br>3. Did you enjoy learning with the Super Divya?<br>4. Do you feel that the skills presented by Super Divya will be useful in facilitating future simulation trainings?<br>5. How satisfied are you with Super Divya platform itself?<br>6. Is the Super Divya story clear? | <b>Choices:</b><br><b>a)</b> Not at all<br><b>b)</b> A little bit<br><b>c)</b> A lot                                                                                        |                                         |
| <b>Adoption Questions</b>                                      | 1. Have you discussed with others (e.g. family, friends, coworkers) your experiences with Super Divya?<br>2. Would you use the Super Divya for training in the future? (Only for NMS)<br>3. Will using the Super Divya be a high priority in the future? (Only for NMS)                                                                                                    | <b>Choices:</b><br><b>a)</b> Not at all<br><b>b)</b> A little bit<br><b>c)</b> A lot                                                                                        |                                         |
| <b>Feasibility Questions</b>                                   | 1. Is it easy for you to access and navigate the Super Divya modules?<br>2. Do you have enough time to watch the Super Divya modules?<br>3. Are you supported enough to participate in Super Divya modules?<br>4. Do you have the resources (data / technology) to watch Super Divya?                                                                                      | <b>Choices:</b><br><b>a)</b> Not at all<br><b>b)</b> A little bit<br><b>c)</b> A lot                                                                                        |                                         |

| Module 6 Survey Tool: Teamwork and communication part 1 |                                                                                         |                                                                                                                                                                                                                                                                                                       |                                                                                                                  |
|---------------------------------------------------------|-----------------------------------------------------------------------------------------|-------------------------------------------------------------------------------------------------------------------------------------------------------------------------------------------------------------------------------------------------------------------------------------------------------|------------------------------------------------------------------------------------------------------------------|
| S. No.                                                  | Knowledge Questions                                                                     | Choices                                                                                                                                                                                                                                                                                               | Correct Answer                                                                                                   |
| 1                                                       | Empathy means to understand one's and other's feelings?                                 | True/False                                                                                                                                                                                                                                                                                            | True                                                                                                             |
| 2                                                       | One of the goals of the debrief huddle is to decide which nurses should speak up first. | True/False                                                                                                                                                                                                                                                                                            | False                                                                                                            |
| 3                                                       | When should a facilitator conduct a debrief huddle?                                     | 1. Prior to a simulation<br>2. During the simulation<br>3. Immediately after the simulation<br>4. Neither necessary nor an important step of simulation                                                                                                                                               | 3. Immediately after the simulation                                                                              |
| 4                                                       | The debrief huddle helps in:                                                            | 1. Understanding one's own and the participants' feelings during the day<br>2. Understanding one's own and the participants feelings about the simulation and set objectives for the debrief<br>3. Identify which providers need additional training<br>4. Setting objectives for the next simulation | 2. Understanding one's own and the participants feelings about the simulation and set objectives for the debrief |
| 5                                                       | What should a simulation facilitator do during the release moment?                      | 1. Disperse the group and let them do their routine duties<br>2. Let the providers take a snack break                                                                                                                                                                                                 | 4. Carefully listen and watch the providers                                                                      |

|   |                                                                                                       |                                                                                                                         |       |
|---|-------------------------------------------------------------------------------------------------------|-------------------------------------------------------------------------------------------------------------------------|-------|
|   |                                                                                                       | 3. Start taking notes about what went well and what could be done better<br>4. Carefully listen and watch the providers |       |
| 6 | Empathy goggles help a facilitator identify the nurses who know the right answers during the debrief. | True/False                                                                                                              | False |
